# Supplementary material
Source: Springer Nature journal article supplement (https://www.springermedizin.de/resource/supplementary/12888_2009_663_MOESM9_ESM.pdf/9478092)

**Subgroup within study****Study name****Statistics for each study****Events / Total****Odds ratio and 95% CI**

|            |                              | Statistics for each study |             |             | Events / Total |            |
|------------|------------------------------|---------------------------|-------------|-------------|----------------|------------|
|            |                              | Odds ratio                | Lower limit | Upper limit | Black          | White      |
| ASPD       | Compton, 2000 <sup>2</sup>   | 0.855                     | 0.578       | 1.265       | 109 / 258      | 77 / 167   |
| ASPD       | Trestman, 2007 <sup>7</sup>  | 1.071                     | 0.699       | 1.640       | 57 / 177       | 67 / 218   |
| ASPD       |                              | 0.948                     | 0.710       | 1.265       |                |            |
| BPD        | Castaneda, 1985 <sup>3</sup> | 0.613                     | 0.368       | 1.023       | 25 / 558       | 41 / 577   |
| BPD        | Trestman, 2007 <sup>7</sup>  | 0.532                     | 0.303       | 0.935       | 21 / 177       | 44 / 218   |
| BPD        |                              | 0.575                     | 0.394       | 0.840       |                |            |
| BPD + ASPD | Coid, 2000 <sup>4</sup>      | 0.217                     | 0.151       | 0.313       | 33 / 628       | 452 / 2224 |
| BPD + ASPD | Trestman, 2007 <sup>7</sup>  | 0.759                     | 0.510       | 1.131       | 78 / 177       | 111 / 218  |
| BPD + ASPD |                              | 0.405                     | 0.119       | 1.381       |                |            |

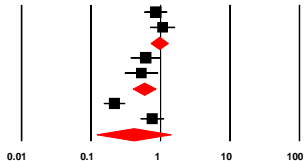

Supplement: MOESM9 [file 9478092]
